# Supplementary material for: Non-Invasive Measurement of Adrenocortical Activity in Blue-Fronted Parrots (Amazona aestiva, Linnaeus, 1758)
Source: PLoS One. 2015 Dec 30;10(12):e0145909. doi: 10.1371/journal.pone.0145909 (PMC4696673; doi:10.1371/journal.pone.0145909)
Supplement: S1 Dataset — (XLS) [file pone.0145909.s001.xls]

## Sheet: Plan1
Dataset S1: Diurnal excretion variation of glucocorticoid metabolites in droppings of Blue-fronted parrots
Animal identification	Gender	Time of day	Glucocorticoids metabolites (ng/g droppings)
A	Male	5 am - 8 am	217.224
A	Male	8 am - 11 am	359.128
A	Male	11 am - 2 pm	162.512
A	Male	2 pm - 5 pm	149.8
A	Male	5 pm - 8 pm	66.976
A	Male	8 pm - 11 pm	98.616
A	Male	11 pm - 2 am	128.408
A	Male	2 am - 5 am	143.024
A	Male	5 am - 8 am (second day)	130.424
B	Male	5 am - 8 am	488.88
B	Male	8 am - 11 am	1905.57
B	Male	11 am - 2 pm	412.272
B	Male	2 pm - 5 pm	230.272
B	Male	5 pm - 8 pm	202.048
B	Male	8 pm - 11 pm	272.664
B	Male	11 pm - 2 am	165.76
B	Male	2 am - 5 am	186.648
B	Male	5 am - 8 am (second day)	370.384
C	Male	5 am - 8 am	327.432
C	Male	8 am - 11 am	346.136
C	Male	11 am - 2 pm	260.008
C	Male	2 pm - 5 pm	156.968
C	Male	5 pm - 8 pm	143.192
C	Male	8 pm - 11 pm	168
C	Male	11 pm - 2 am	168
C	Male	2 am - 5 am	144.984
C	Male	5 am - 8 am (second day)	124.88
D	Male	5 am - 8 am	251.384
D	Male	8 am - 11 am	362.992
D	Male	11 am - 2 pm	285.32
D	Male	2 pm - 5 pm	323.904
D	Male	5 pm - 8 pm	278.992
D	Male	8 pm - 11 pm	172.144
D	Male	11 pm - 2 am	217.784
D	Male	2 am - 5 am	309.512
D	Male	5 am - 8 am (second day)	488.544
E	Male	5 am - 8 am	242.536
E	Male	8 am - 11 am	178.696
E	Male	11 am - 2 pm	204.792
E	Male	2 pm - 5 pm	187.88
E	Male	5 pm - 8 pm	128.464
E	Male	8 pm - 11 pm	165.536
E	Male	11 pm - 2 am	220.472
E	Male	2 am - 5 am	168
E	Male	5 am - 8 am (second day)	188.16
F	Male	5 am - 8 am	357.392
F	Male	8 am - 11 am	296.632
F	Male	11 am - 2 pm	319.872
F	Male	2 pm - 5 pm	215.04
F	Male	5 pm - 8 pm	159.824
F	Male	8 pm - 11 pm	172.424
F	Male	11 pm - 2 am	317.856
F	Male	2 am - 5 am	255.528
F	Male	5 am - 8 am (second day)	263.368
G	Male	5 am - 8 am	298.144
G	Male	8 am - 11 am	416.36
G	Male	11 am - 2 pm	225.456
G	Male	2 pm - 5 pm	155.176
G	Male	5 pm - 8 pm	172.256
G	Male	8 pm - 11 pm	130.872
G	Male	11 pm - 2 am	99.008
G	Male	2 am - 5 am	113.736
G	Male	5 am - 8 am (second day)	134.232
H	Male	5 am - 8 am	415.24
H	Male	8 am - 11 am	158.088
H	Male	11 am - 2 pm	160.16
H	Male	2 pm - 5 pm	133.896
H	Male	5 pm - 8 pm	187.712
H	Male	8 pm - 11 pm	146.72
H	Male	11 pm - 2 am	144.592
H	Male	2 am - 5 am	169.736
H	Male	5 am - 8 am (second day)	288.96
I	Male	5 am - 8 am	88.312
I	Male	8 am - 11 am	77.84
I	Male	11 am - 2 pm	108.864
I	Male	2 pm - 5 pm	132.44
I	Male	5 pm - 8 pm	80.752
I	Male	8 pm - 11 pm	70.616
I	Male	11 pm - 2 am	76.608
I	Male	2 am - 5 am	102.312
I	Male	5 am - 8 am (second day)	99.176
J	Male	5 am - 8 am	173.208
J	Male	8 am - 11 am	103.824
J	Male	11 am - 2 pm	103.712
J	Male	2 pm - 5 pm	104.048
J	Male	5 pm - 8 pm	113.848
J	Male	8 pm - 11 pm	134.568
J	Male	11 pm - 2 am	166.488
J	Male	2 am - 5 am	108.864
J	Male	5 am - 8 am (second day)	153.944
K	Male	5 am - 8 am	170.856
K	Male	8 am - 11 am	144.2
K	Male	11 am - 2 pm	105.728
K	Male	2 pm - 5 pm	138.6
K	Male	5 pm - 8 pm	154.056
K	Male	8 pm - 11 pm	138.88
K	Male	11 pm - 2 am	120.344
K	Male	2 am - 5 am	158.648
K	Male	5 am - 8 am (second day)	189.28
L	Male	5 am - 8 am	89.656
L	Male	8 am - 11 am	219.52
L	Male	11 am - 2 pm	113.848
L	Male	2 pm - 5 pm	123.816
L	Male	5 pm - 8 pm	87.472
L	Male	8 pm - 11 pm	73.808
L	Male	11 pm - 2 am	80.136
L	Male	2 am - 5 am	115.36
L	Male	5 am - 8 am (second day)	150.584
O	Female	5 am - 8 am	213.304
O	Female	8 am - 11 am	269.64
O	Female	11 am - 2 pm	239.624
O	Female	2 pm - 5 pm	453.096
O	Female	5 pm - 8 pm	364.896
O	Female	8 pm - 11 pm	184.464
O	Female	11 pm - 2 am	216.776
O	Female	2 am - 5 am	217.112
O	Female	5 am - 8 am (second day)	241.808
P	Female	5 am - 8 am	105.784
P	Female	8 am - 11 am	57.736
P	Female	11 am - 2 pm	60.984
P	Female	2 pm - 5 pm	102.816
P	Female	5 pm - 8 pm	42.112
P	Female	8 pm - 11 pm	32.928
P	Female	11 pm - 2 am	131.152
P	Female	2 am - 5 am	144.2
P	Female	5 am - 8 am (second day)	165.872
Q	Female	5 am - 8 am	498.568
Q	Female	8 am - 11 am	198.8
Q	Female	11 am - 2 pm	114.184
Q	Female	2 pm - 5 pm	157.416
Q	Female	5 pm - 8 pm	65.184
Q	Female	8 pm - 11 pm	124.88
Q	Female	11 pm - 2 am	133.056
Q	Female	2 am - 5 am	461.44
Q	Female	5 am - 8 am (second day)	789.824
R	Female	5 am - 8 am	545.552
R	Female	8 am - 11 am	610.792
R	Female	11 am - 2 pm	292.376
R	Female	2 pm - 5 pm	171.696
R	Female	5 pm - 8 pm	84.336
R	Female	8 pm - 11 pm	174.104
R	Female	11 pm - 2 am	177.8
R	Female	2 am - 5 am	219.8
R	Female	5 am - 8 am (second day)	631.568
S	Female	5 am - 8 am	217.392
S	Female	8 am - 11 am	145.992
S	Female	11 am - 2 pm	105.224
S	Female	2 pm - 5 pm	97.048
S	Female	5 pm - 8 pm	69.664
S	Female	8 pm - 11 pm	130.368
S	Female	11 pm - 2 am	91.84
S	Female	2 am - 5 am	91.616
S	Female	5 am - 8 am (second day)	138.936
T	Female	5 am - 8 am	70.616
T	Female	8 am - 11 am	46.704
T	Female	11 am - 2 pm	37.016
T	Female	2 pm - 5 pm	60.144
T	Female	5 pm - 8 pm	75.432
T	Female	8 pm - 11 pm	67.368
T	Female	11 pm - 2 am	41.552
T	Female	2 am - 5 am	68.712
T	Female	5 am - 8 am (second day)	121.128
U	Female	5 am - 8 am	230.328
U	Female	8 am - 11 am	263.48
U	Female	11 am - 2 pm	120.512
U	Female	2 pm - 5 pm	114.24
U	Female	5 pm - 8 pm	123.48
U	Female	8 pm - 11 pm	82.152
U	Female	11 pm - 2 am	162.064
U	Female	2 am - 5 am	182.672
U	Female	5 am - 8 am (second day)	108.696
V	Female	5 am - 8 am	77.28
V	Female	8 am - 11 am	106.232
V	Female	11 am - 2 pm	114.352
V	Female	2 pm - 5 pm	58.688
V	Female	5 pm - 8 pm	58.688
V	Female	8 pm - 11 pm	136.528
V	Female	11 pm - 2 am	115.472
V	Female	2 am - 5 am	91.672
V	Female	5 am - 8 am (second day)	173.6
X	Female	5 am - 8 am	396.592
X	Female	8 am - 11 am	102.942
X	Female	11 am - 2 pm	217.448
X	Female	2 pm - 5 pm	201.768
X	Female	5 pm - 8 pm	229.488
X	Female	8 pm - 11 pm	195.02
X	Female	11 pm - 2 am	160.552
X	Female	2 am - 5 am	245.056
X	Female	5 am - 8 am (second day)	438.088
Z	Female	5 am - 8 am	151.368
Z	Female	8 am - 11 am	92.736
Z	Female	11 am - 2 pm	31.024
Z	Female	2 pm - 5 pm	66.192
Z	Female	5 pm - 8 pm	45.416
Z	Female	8 pm - 11 pm	104.552
Z	Female	11 pm - 2 am	59.136
Z	Female	2 am - 5 am	93.576
Z	Female	5 am - 8 am (second day)	167.776
